# Supplementary material for: Hybrid stenting with silicone Y stents and metallic stents in the management of severe malignant airway stenosis and fistulas
Source: PubMed Central journal article supplement — Transl Lung Cancer Res. 2021 May;10(5):2218–28. doi: 10.21037/tlcr-21-353 (PMC8182715; doi:10.21037/tlcr-21-353), 2021-05
Supplement: tlcr-10-05-2218-dss.pdf [file tlcr-10-05-2218-dss.pdf]

## Data Sharing Statement

|                     |                                                                                                                                                     |                                                                                                                             |
|---------------------|-----------------------------------------------------------------------------------------------------------------------------------------------------|-----------------------------------------------------------------------------------------------------------------------------|
| <b>Article Info</b> | <a href="http://dx.doi.org/10.21037/tlcr-21-353">http://dx.doi.org/10.21037/tlcr-21-353</a>                                                         |                                                                                                                             |
| <b>Item</b>         | <b>Question</b>                                                                                                                                     | <b>Authors' Response<br/>(place "-" if not applicable)</b>                                                                  |
| 1                   | Would you like to share data collected for your study to others?                                                                                    | Yes.                                                                                                                        |
| 2                   | If not, would you like to share the reason for your decision?                                                                                       | -                                                                                                                           |
| 3                   | What data in particular will be shared?                                                                                                             | Data of patients' clinical characteristic, outcome and follow-up.                                                           |
| 4                   | Any other documents will be shared? Such as study protocol, statistical analysis plan, informed consent form, clinical study report, analytic code. | Study protocol, statistical analysis plan, informed consent form will be shared.                                            |
| 5                   | When will data availability begin?                                                                                                                  | From the publication date.                                                                                                  |
| 6                   | When will data availability end?                                                                                                                    | Two years within the publication date                                                                                       |
| 7                   | To whom will you share the data?                                                                                                                    | Medical oncologists and interventional pulmonologist                                                                        |
| 8                   | For what type of analysis or purpose?                                                                                                               | For analysis to formulate treatment plan for these patients                                                                 |
| 9                   | How or where can the data/documents be obtained?                                                                                                    | Emails could be sent to the address below to obtain the shared data: <a href="mailto:282172208@qq.com">282172208@qq.com</a> |
| 10                  | Any other restrictions?                                                                                                                             | We may balance the potential benefits and risks for each request and then provide the data that could be shared.            |
